# Supplementary material
Source: PubMed Central journal article supplement (PMC6764063)
Supplement: DS_10.1369_0022155419860134.pdf [file DS_10.1369_0022155419860134.pdf]

## Supplemental Legends

**Supplemental Figure S1.** HID-AB stained pyloric mucosa of *A4gnt* KO mice. HID-AB staining differentiates sulfomucins (black color) from sialomucins (sky blue color), and sulfomucins production in *A4gnt* KO mice is more prominent compared with that in WT mice. Hyperplasia (at 5 weeks), low-grade dysplasia (at 10 weeks), high-grade dysplasia (at 20 and 30 weeks), and adenocarcinoma (from 40 to 60 weeks) are shown. Pyloric mucosa of WT mice at 60-weeks-old is shown as a control. Bar = 200  $\mu$ m. HID-AB staining. wk, weeks.

**Supplemental Figure S2.** Quantitative RT-PCR assay comparing three sulfotransferase genes (*Chst2*, *Chst4*, and *Chst7*) in WT and *A4gnt* KO mice. RNA samples were extracted from formalin-fixed and paraffin-embedded tissue blocks of glandular stomach, as described previously (Karasawa et al. J Clin Invest 2012; 122:923-34). The assay protocol is described in the text. Assay IDs of TaqMan probes used were: Mm00490018\_g1 for *Chst2*, Mm00488783\_s1 for *Chst4*, and Mm00491466\_m1 for *Chst7*. Fold-expression was calculated by setting the median value of expression in 5-week-old WT mice to 1.0. Data represent the mean  $\pm$  SEM (n = 6 for each group). \*\* $P < 0.01$ . wk, weeks.

**Supplemental Figure S3.** Representative histopathology analysis of pyloric mucosa from *A4gnt* KO mice. Hyperplasia (at 5 weeks), low-grade dysplasia (at 10 weeks), high-grade dysplasia (at 20 and 30 weeks), and adenocarcinoma (from 40 to 60 weeks) are shown. Pyloric mucosa of WT mice at 60-weeks-old is shown as a control. Bar = 200  $\mu$ m. H&E staining. wk, weeks.

**Supplemental Figure S4.** AB stained pyloric mucosa of *A4gnt* KO mice and *A4gnt/Chst4* DKO mice of 10-week-old mice. Comparable amounts of sialomucins are detected in both mutant mice. Bar = 200  $\mu$ m.

5 wk  
(*A4gnt* KO)

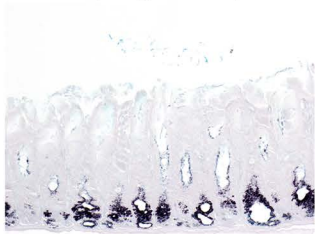

10 wk  
(*A4gnt* KO)

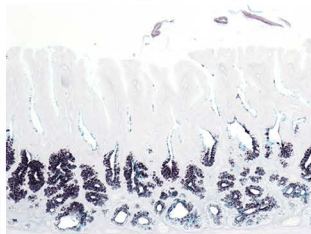

20 wk  
(*A4gnt* KO)

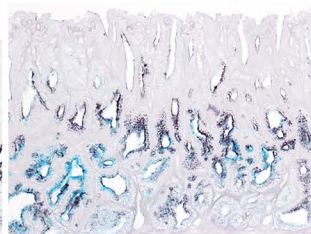

30 wk  
(*A4gnt* KO)

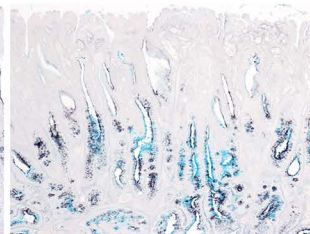

40 wk  
(*A4gnt* KO)

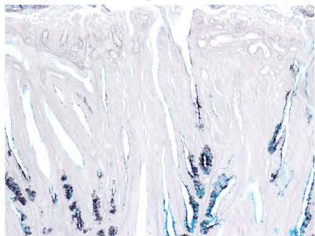

50 wk  
(*A4gnt* KO)

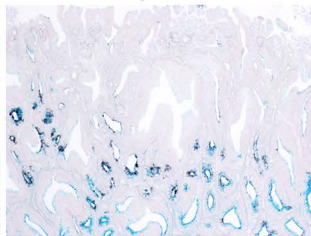

60 wk  
(*A4gnt* KO)

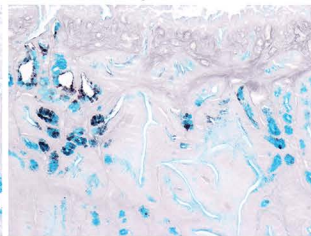

60 wk  
(WT)

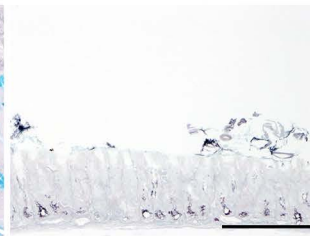

Supplemental Figure S1

WT  
*A4gnt* KO

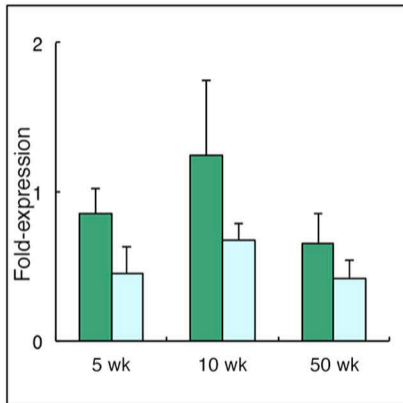

*Chst2*

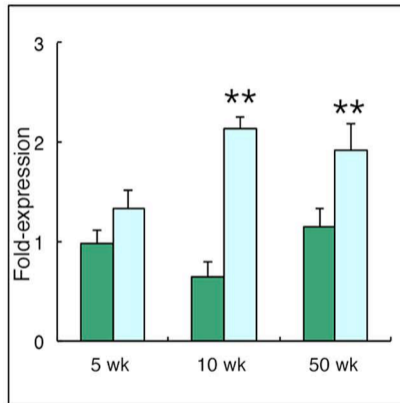

*Chst4*

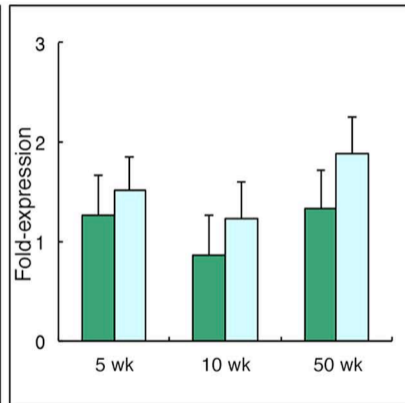

*Chst7*

Supplemental Figure S2

5 wk  
(*A4gnt* KO)

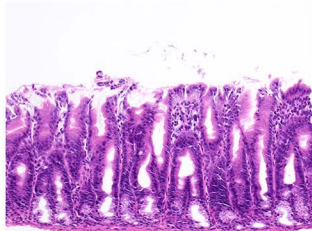

10 wk  
(*A4gnt* KO)

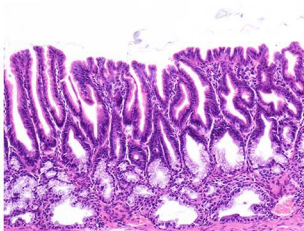

20 wk  
(*A4gnt* KO)

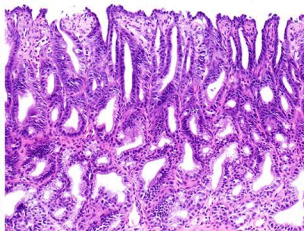

30 wk  
(*A4gnt* KO)

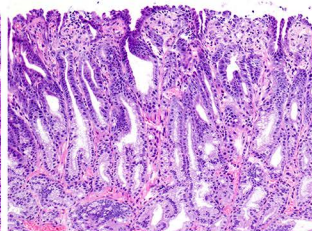

40 wk  
(*A4gnt* KO)

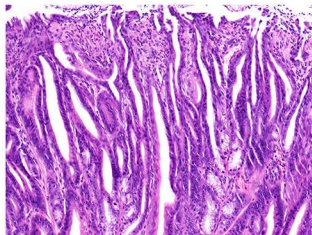

50 wk  
(*A4gnt* KO)

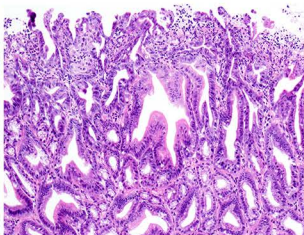

60 wk  
(*A4gnt* KO)

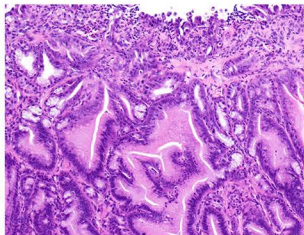

60 wk  
(WT)

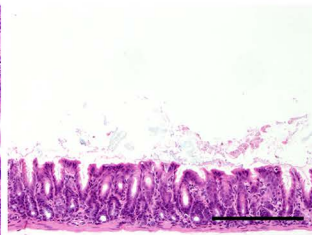

Supplemental Figure S3

*A4gnt* KO

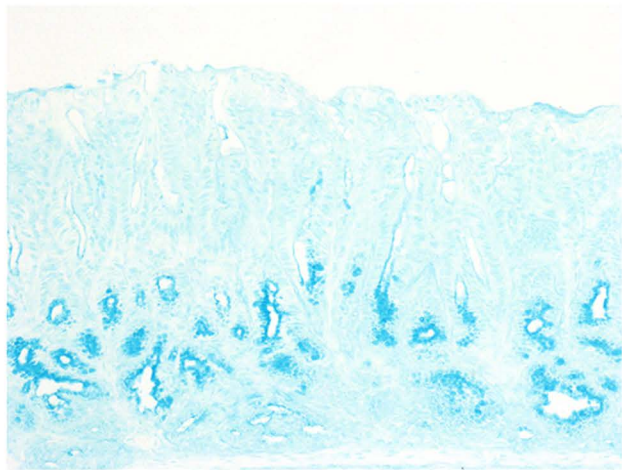

*A4gnt/Chst4* DKO

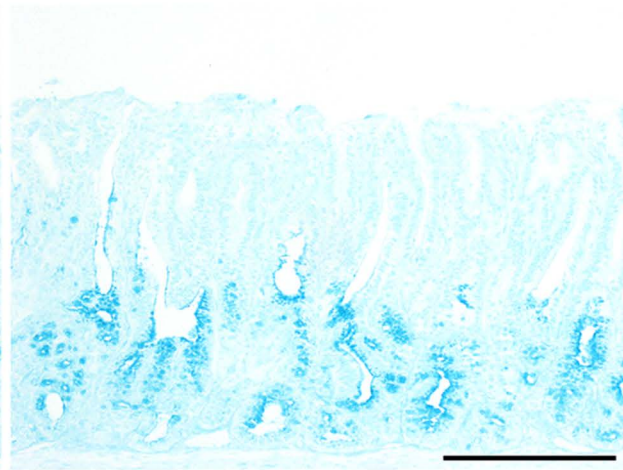

Supplemental Figure S4
